# Supplementary material for: Synthesis, biological evaluation and structural characterization of novel glycopeptide analogues of nociceptin N/OFQ
Source: Royal Society of Chemistry journal article supplement (doi:10.1039/c1ob05197k), 2011-01-01

# Synthesis, biological and structural characterization of novel glycopeptide analogues of nociceptin N/OFQ

## Supplementary Information

*Gemma Arsequell<sup>1</sup>, Mònica Rosa<sup>1</sup>, Carlos Mayato<sup>2</sup>, Rosa L. Dorta<sup>2</sup>, Verónica Gonzalez-Nunez<sup>3</sup>, Katherine Barreto-Valer<sup>3</sup>, Filipa Marcelo<sup>4</sup>, Luis P. Calle<sup>4</sup>, Jesús T. Vázquez<sup>2</sup>, Raquel E. Rodríguez<sup>3</sup>, Jesús Jiménez-Barbero<sup>4</sup>, Gregorio Valencia<sup>1</sup>.*

<sup>1</sup>Instituto de Química Avanzada de Cataluña (IQAC-CSIC), Barcelona (Spain);

<sup>2</sup>Instituto Universitario de Bio-Orgánica “Antonio González”, Universidad de La Laguna, La Laguna, Tenerife (Spain); <sup>3</sup>Department of Biochemistry and Molecular Biology, Faculty of Medicine, Instituto de Neurociencias de Castilla y León (INCyL), University of Salamanca (Spain); <sup>4</sup>Chemical and Physical Biology, Centro de Investigaciones Biológicas, (CIB-CSIC), Madrid (Spain).

Correspondence to Dr. Gregorio Valencia, Instituto de Química Avanzada de Cataluña (IQAC-CSIC), Jordi Girona 18-26, E08034-Barcelona (Spain); Ph.: +34934006113; Fax: +34 93 2045904; e-mail: gregorio.valencia@iqac.csic.es.

**Data for nociceptin (N/OFQ) and the following glycopeptides:**

| # | Glycopeptide sequence                                                                                                                              | Name                                                              |
|---|----------------------------------------------------------------------------------------------------------------------------------------------------|-------------------------------------------------------------------|
| 1 | H-Phe-Gly-Gly-Phe- <i>Thr</i> <sup>5</sup> -( $\alpha$ - <i>GalNAc</i> )-Gly-Ala-Arg-Lys-Ser <sup>10</sup> -Ala-Arg-Lys-Leu-Ala-Asn-Gln-OH         | [ <i>Thr</i> <sup>5</sup> - <i>O</i> - $\alpha$ -D-GalNAc]-N/OFQ  |
| 2 | H-Phe-Gly-Gly-Phe- <i>Thr</i> <sup>5</sup> -Gly-Ala-Arg-Lys- <i>Ser</i> <sup>10</sup> -( $\alpha$ - <i>GalNAc</i> )-Ala-Arg-Lys-Leu-Ala-Asn-Gln-OH | [ <i>Ser</i> <sup>10</sup> - <i>O</i> - $\alpha$ -D-GalNAc]-N/OFQ |
| 3 | H-Phe-Gly-Gly-Phe- <i>Thr</i> <sup>5</sup> -Gly-Ala-Arg-Lys- <i>Ser</i> <sup>10</sup> -( $\beta$ - <i>GlcNAc</i> )-Ala-Arg-Lys-Leu-Ala-Asn-Gln-OH  | [ <i>Ser</i> <sup>10</sup> - <i>O</i> - $\beta$ -D-GlcNAc]-N/OFQ  |

**Table of contents**

|                           | pages         |
|---------------------------|---------------|
| <b>HRMS (UPLC-TOF/MS)</b> | <b>S3-S8</b>  |
| <b>NMR</b>                | <b>S9-S24</b> |
| <b>CD</b>                 | <b>S25</b>    |
| <b>HPLC</b>               | <b>S27</b>    |

**UPLC-TOF/MS**

**NOCICEPTIN (N/OFQ)**

NC-SerGalNAc-OH3

|   |                                                                                                                           |                                                  |
|---|---------------------------------------------------------------------------------------------------------------------------|--------------------------------------------------|
| 2 | H-Phe-Gly-Gly-Phe-Thr <sup>5</sup> -Gly-Ala-Arg-Lys-Ser <sup>10</sup> -( $\alpha$ -GalNAc)-Ala-Arg-Lys-Leu-Ala-Asn-Gln-OH | [Ser <sup>10</sup> -O- $\alpha$ -D-GalNAc]-N/OFQ |
|---|---------------------------------------------------------------------------------------------------------------------------|--------------------------------------------------|

NC-SerGlcNAc-OH3

|   |                                                                                                                                   |                                                 |
|---|-----------------------------------------------------------------------------------------------------------------------------------|-------------------------------------------------|
| 3 | H-Phe-Gly-Gly-Phe-Thr <sup>5</sup> -Gly-Ala-Arg-Lys-Ser <sup>10</sup> -( $\beta$ - <i>GlcNAc</i> )-Ala-Arg-Lys-Leu-Ala-Asn-Gln-OH | [Ser <sup>10</sup> -O- $\beta$ -D-GlcNAc]-N/OFQ |
|---|-----------------------------------------------------------------------------------------------------------------------------------|-------------------------------------------------|

NC-SerGlcNAc-OH3 (expanded)

NC-ThrGalNAc-OH3

|   |                                                                                                                                   |                                                 |
|---|-----------------------------------------------------------------------------------------------------------------------------------|-------------------------------------------------|
| 1 | H-Phe-Gly-Gly-Phe- <i>Thr</i> <sup>5</sup> -( <i>α</i> -GalNAc)-Gly-Ala-Arg-Lys-Ser <sup>10</sup> -Ala-Arg-Lys-Leu-Ala-Asn-Gln-OH | [Thr <sup>5</sup> -O- <i>α</i> -D-GalNAc]-N/OFQ |
|---|-----------------------------------------------------------------------------------------------------------------------------------|-------------------------------------------------|

UPLC-TOF-MS

NC-ThrGalNac-OH3

|   |                                                                                                                                   |                                                             |
|---|-----------------------------------------------------------------------------------------------------------------------------------|-------------------------------------------------------------|
| 1 | H-Phe-Gly-Gly-Phe- <i>Thr</i> <sup>5</sup> -( $\alpha$ -GalNac)-Gly-Ala-Arg-Lys-Ser <sup>10</sup> -Ala-Arg-Lys-Leu-Ala-Asn-Gln-OH | [ <i>Thr</i> <sup>5</sup> - $O$ - $\alpha$ -D-GalNac]-N/OFQ |
|---|-----------------------------------------------------------------------------------------------------------------------------------|-------------------------------------------------------------|

**NCThrGal 16:30**

07101026 (0.018) Is (1.00,1.00) C87H142N28O27

1: TOF MS ES+  
3.49e12

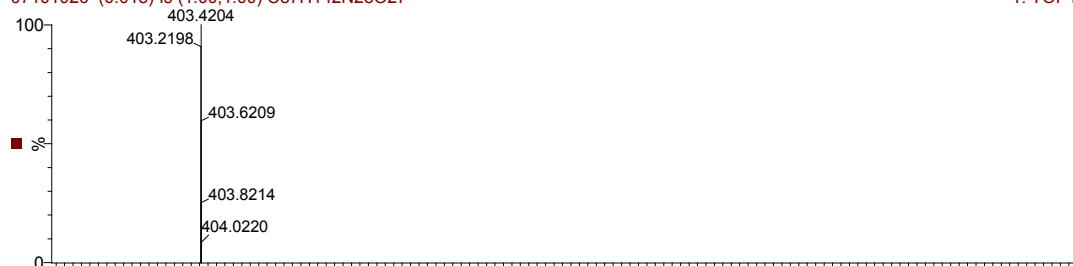

07101026 (0.018) Is (1.00,1.00) C87H142N28O27

1: TOF MS ES+  
3.49e12

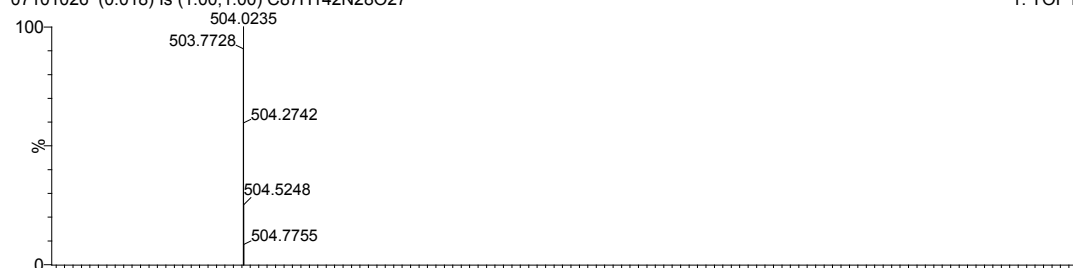

07101026 (0.018) Is (1.00,1.00) C87H142N28O27

1: TOF MS ES+  
3.49e12

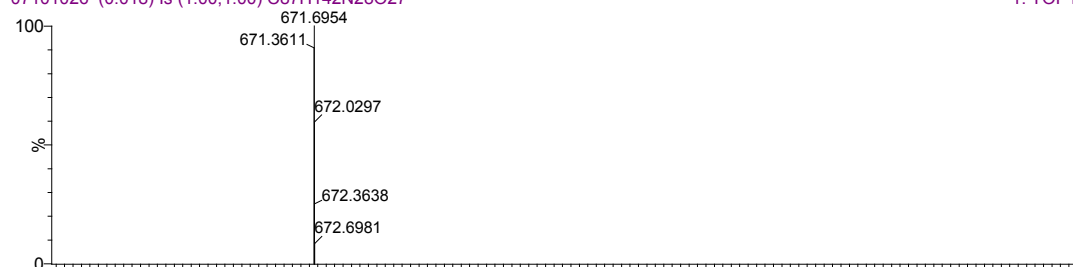

07101026 (0.018) Is (1.00,1.00) C87H142N28O27

1: TOF MS ES+  
3.49e12

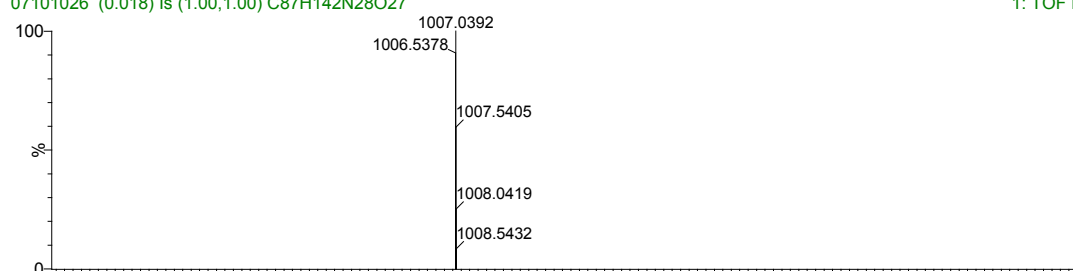

07101026 (0.018) Is (1.00,1.00) C87H142N28O27

1: TOF MS ES+  
3.49e12

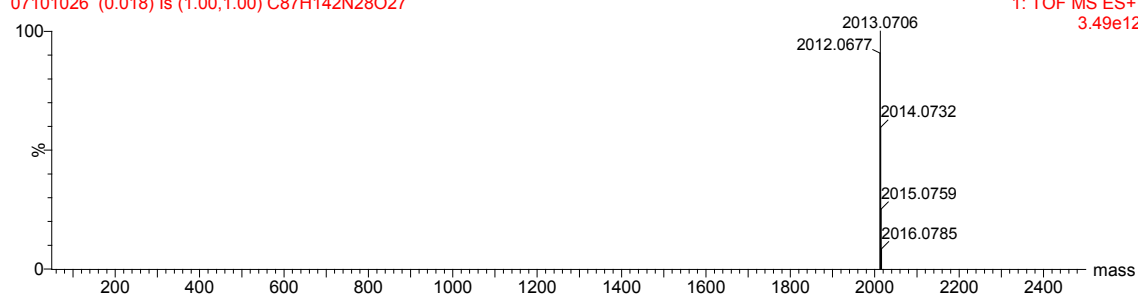



**Table S1.** <sup>1</sup>H Chemical shift (p.p.m.) for nociceptin (**1**) in water solution at 278K.

| Nociceptin        |       |            |               |                                                                    |
|-------------------|-------|------------|---------------|--------------------------------------------------------------------|
| a.a.              | NH    | H $\alpha$ | H $\beta$     | misc.                                                              |
| Phe <sup>1</sup>  |       |            |               |                                                                    |
| Gly <sup>2</sup>  |       |            |               |                                                                    |
| Gly <sup>3</sup>  | 7,887 | 3,663      |               |                                                                    |
| Phe <sup>4</sup>  | 8,205 | 4,513      | 2,853 ; 2,917 | *                                                                  |
| Thr <sup>5</sup>  | 8,198 | 4,110      | 0,966         | 1,029(H $\gamma$ )                                                 |
| Gly <sup>6</sup>  | 7,659 | 3,661      |               |                                                                    |
| Ala <sup>7</sup>  | 8,109 | 4,093      | 1,181         |                                                                    |
| Arg <sup>8</sup>  | 8,188 | 4,024      | 1,555         | 1,412(H $\gamma$ ); 2,974(H $\delta$ ); 7,056(H $\epsilon$ )       |
| Lys <sup>9</sup>  | 8,384 | 4,071      | 1,579         | 1,224(H $\gamma$ ); 1,465(H $\delta$ ); 2,783(H $\epsilon$ )       |
| Ser <sup>10</sup> | 8,278 | 4,195      | 3,647         |                                                                    |
| Ala <sup>11</sup> | 8,343 | 4,099      | 1,203         |                                                                    |
| Arg <sup>12</sup> | 8,307 | 4,075      | 1,561         | 1,417(H $\gamma$ ); 2,961(H $\delta$ ); 7,019(H $\epsilon$ )       |
| Lys <sup>13</sup> | 8,347 | 4,056      | 1,579         | 1,224(H $\gamma$ ); 1,465(H $\delta$ ); 2,780(H $\epsilon$ )       |
| Leu <sup>14</sup> | 8,276 | 4,128      | 1,412 ; 1,431 | 1,373(H $\gamma$ ); 0,676(H $\delta$ )                             |
| Ala <sup>15</sup> | 8,225 | 4,079      | 1,196         |                                                                    |
| Asn <sup>16</sup> | 8,338 | 4,423      | 2,589 ; 2,659 | 7,553(H $\delta$ 21); 6,784(H $\delta$ 22)                         |
| Gln <sup>17</sup> | 7,743 | 3,951      | 1,917 ; 1,756 | 2,068(H $\gamma$ ); 7,460(H $\epsilon$ 21); 6,745(H $\epsilon$ 22) |
| *overlapped       |       |            |               |                                                                    |

**Table S2.** <sup>1</sup>H Chemical shift (p.p.m.) for (Ser<sup>10</sup>-O- $\alpha$ -D-GalNAc)-N/OFQ (**2**) in water solution at T=278K.

| (Ser <sup>10</sup> -O- $\alpha$ -D-GalNAc)-N/OFQ |       |            |               |                                                                    |
|--------------------------------------------------|-------|------------|---------------|--------------------------------------------------------------------|
| a.a.                                             | NH    | H $\alpha$ | H $\beta$     | misc.                                                              |
| Phe <sup>1</sup>                                 |       |            |               |                                                                    |
| Gly <sup>2</sup>                                 |       |            |               |                                                                    |
| Gly <sup>3</sup>                                 | 7,747 | 2,530      |               |                                                                    |
| Phe <sup>4</sup>                                 | 8,067 | 4,384      | 2,783 ; 2,727 | *                                                                  |
| Thr <sup>5</sup>                                 | 8,058 | 3,972      | 0,838         | 1,042(H $\gamma$ )                                                 |
| Gly <sup>6</sup>                                 | 7,539 | 3,531      |               |                                                                    |
| Ala <sup>7</sup>                                 | 7,961 | 3,948      | 1,036         |                                                                    |
| Arg <sup>8</sup>                                 | 8,092 | 3,948      | 1,453         | 1,298(H $\gamma$ ); 2,824(H $\delta$ ); 6,939(H $\epsilon$ )       |
| Lys <sup>9</sup>                                 | 8,193 | 3,967      | 1,424         | 1,099(H $\gamma$ ); 1,348(H $\delta$ ); 2,637(H $\epsilon$ )       |
| Ser <sup>10</sup>                                | 8,362 | 4,243      | 3,584 ; 3,419 |                                                                    |
| Ala <sup>11</sup>                                | 8,298 | 3,996      | 1,046         |                                                                    |
| Arg <sup>12</sup>                                | 8,163 | 3,889      | 1,430         | 1,292(H $\gamma$ ); 2,851(H $\delta$ ); 6,989(H $\epsilon$ )       |
| Lys <sup>13</sup>                                | 8,272 | 3,924      | 1,348         | 1,095(H $\gamma$ ); 1,348(H $\delta$ ); 2,647(H $\epsilon$ )       |
| Leu <sup>14</sup>                                | 8,173 | 3,993      | 1,298         | 1,237(H $\gamma$ ); 0,568(H $\delta$ )                             |
| Ala <sup>15</sup>                                | 8,112 | 3,939      | 1,052         |                                                                    |
| Asn <sup>16</sup>                                | 8,216 | 4,295      | 2,512 ; 2,475 | 7,325(H $\delta$ 21); 6,621 (H $\delta$ 22)                        |
| Gln <sup>17</sup>                                | 7,620 | 3,825      | 1,786 ; 1,599 | 1,942(H $\gamma$ ); 7,417(H $\epsilon$ 21); 6,662(H $\epsilon$ 22) |
| *overlapped                                      |       |            |               |                                                                    |

| sugar residue      | H1    | H2    | H3    | H4    | H5 | H6 <sub>1</sub> | H6 <sub>2</sub> | NHacetamide | CH <sub>3</sub> acetamide |
|--------------------|-------|-------|-------|-------|----|-----------------|-----------------|-------------|---------------------------|
| $\alpha$ -D-GacNAc | 4,529 | 3,811 | 3,539 | 3,604 |    | 3,532           | 3,390           | 7,781       | 1,682                     |

**Table S3.**  $^1\text{H}$  Chemical shift for (Ser<sup>10</sup>-O- $\beta$ -D-GlcNAc)-N/OFQ (**3**) in water solution at 278K.

| (Ser <sup>10</sup> -O- $\beta$ -D-GlcNAc)-N/OFQ |       |            |               |                                                                    |
|-------------------------------------------------|-------|------------|---------------|--------------------------------------------------------------------|
| a.a.                                            | NH    | H $\alpha$ | H $\beta$     | misc.                                                              |
| Phe <sup>1</sup>                                |       |            |               |                                                                    |
| Gly <sup>2</sup>                                | 8,252 | 3,680      |               |                                                                    |
| Gly <sup>3</sup>                                | 7,872 | 3,649      |               |                                                                    |
| Phe <sup>4</sup>                                | 8,332 | 4,507      | 2,844 ; 2,898 | *                                                                  |
| Thr <sup>5</sup>                                | 8,171 | 4,099      | 3,997         | 0,960(H $\gamma$ )                                                 |
| Gly <sup>6</sup>                                | 7,616 | 3,656      |               |                                                                    |
| Ala <sup>7</sup>                                | 8,069 | 4,082      | 1,156         |                                                                    |
| Arg <sup>8</sup>                                | 8,155 | 4,026      | 1,554         | 1,417(H $\gamma$ ); 2,965(H $\delta$ ); 7,039(H $\epsilon$ )       |
| Lys <sup>9</sup>                                | 8,287 | 4,069      | 1,556         | 1,210(H $\gamma$ ); 1,459(H $\delta$ ); 2,773(H $\epsilon$ )       |
| Ser <sup>10</sup>                               | 8,201 | 4,285      | 3,761         |                                                                    |
| Ala <sup>11</sup>                               | 8,232 | 4,065      | 1,166         |                                                                    |
| Arg <sup>12</sup>                               | 8,219 | 4,066      | 1,554         | 1,419(H $\gamma$ ); 2,974(H $\delta$ ); 7,053(H $\epsilon$ )       |
| Lys <sup>13</sup>                               | 8,348 | 4,067      | 1,559         | 1,179(H $\gamma$ ); 1,465(H $\delta$ ); 2,764(H $\epsilon$ )       |
| Leu <sup>14</sup>                               | 8,276 | 4,086      | 1,543         | 1,414(H $\gamma$ ); 0,677(H $\delta$ )                             |
| Ala <sup>15</sup>                               | 8,225 | 4,060      | 1,192         |                                                                    |
| Asn <sup>16</sup>                               | 8,332 | 4,422      | 2,570         | 7,527(H $\delta$ 21); 6,785(H $\delta$ 22)                         |
| Gln <sup>17</sup>                               | 7,736 | 3,941      | 1,911 ; 1,712 | 2,059(H $\gamma$ ); 7,434(H $\epsilon$ 21); 6,751(H $\epsilon$ 22) |
| *overlapped                                     |       |            |               |                                                                    |

| sugar residue     | H1    | H2    | H3    | H4    | H5    | H6 <sub>1</sub> | H6 <sub>2</sub> | NHacetamide | CH <sub>3</sub> acetamide |
|-------------------|-------|-------|-------|-------|-------|-----------------|-----------------|-------------|---------------------------|
| $\beta$ -D-GlcNAc | 4,321 | 3,497 | 3,316 | 3,237 | 3,715 | 3,521           | 3,208           | 8,136       | 1,804                     |

**Table S4.**  $^1\text{H}$  chemical shift (p.p.m.) for (Thr<sup>5</sup>-O- $\alpha$ -D-GalNAc)-N/OFQ (**4**) in water solution at 278K.

| (Thr <sup>5</sup> -O- $\alpha$ -D-GalNAc)-N/OFQ |       |            |               |                                                                    |
|-------------------------------------------------|-------|------------|---------------|--------------------------------------------------------------------|
| a.a.                                            | NH    | H $\alpha$ | H $\beta$     | misc.                                                              |
| Phe <sup>1</sup>                                |       |            |               |                                                                    |
| Gly <sup>2</sup>                                |       |            |               |                                                                    |
| Gly <sup>3</sup>                                | 7,794 | 3,649      |               |                                                                    |
| Phe <sup>4</sup>                                | 8,194 | 4,597      | 2,895         | *                                                                  |
| Thr <sup>5</sup>                                | 8,446 | 4,326      | 4,135         | 0,978(H $\gamma$ )                                                 |
| Gly <sup>6</sup>                                | 8,224 | 3,684      |               |                                                                    |
| Ala <sup>7</sup>                                | 8,231 | 4,068      | 1,163         |                                                                    |
| Arg <sup>8</sup>                                | 8,196 | 4,044      | 1,544         | 1,406(H $\gamma$ ); 2,964(H $\delta$ ); 7,058(H $\epsilon$ )       |
| Lys <sup>9</sup>                                | 8,336 | 4,068      | 1,560         | 1,220(H $\gamma$ ); 1,464(H $\delta$ ); 2,772(H $\epsilon$ )       |
| Ser <sup>10</sup>                               | 8,308 | 4,184      | 3,637         |                                                                    |
| Ala <sup>11</sup>                               | 8,372 | 4,080      | 1,173         |                                                                    |
| Arg <sup>12</sup>                               | 8,368 | 4,024      | 1,407         | 1,407(H $\gamma$ ); 2,953(H $\delta$ ); 7,099(H $\epsilon$ )       |
| Lys <sup>13</sup>                               | 8,432 | 4,087      | 1,565         | 1,203(H $\gamma$ ); 1,461(H $\delta$ ); 2,765(H $\epsilon$ )       |
| Leu <sup>14</sup>                               | 8,259 | 4,105      | 1,415         | 1,344(H $\gamma$ ); 0,676(H $\delta$ )                             |
| Ala <sup>15</sup>                               | 8,210 | 4,052      | 1,167         |                                                                    |
| Asn <sup>16</sup>                               | 8,321 | 4,417      | 2,640 ; 2,577 | 7,535(H $\delta$ 21); 6,778(H $\delta$ 22)                         |
| Gln <sup>17</sup>                               | 7,737 | 2,934      | 1,902 ; 1,732 | 2,060(H $\gamma$ ); 7,441(H $\epsilon$ 21); 6,731(H $\epsilon$ 22) |
| *overlapped                                     |       |            |               |                                                                    |

| sugar residue      | H1    | H2    | H3    | H4    | H5    | H6 <sub>1</sub> | H6 <sub>2</sub> | NHacetamide | CH <sub>3</sub> acetamide |
|--------------------|-------|-------|-------|-------|-------|-----------------|-----------------|-------------|---------------------------|
| $\alpha$ -D-GalNAc | 4,688 | 3,815 | 3,672 | 3,686 | 3,541 | 3,507           | 3,792           | 7,717       | 1,748                     |

**Table S5.** <sup>1</sup>H Chemical shift (p.p.m.) for nociceptin (**1**) in SDS micelles at 288K.

| Nociceptin        |       |               |               |                                                                    |
|-------------------|-------|---------------|---------------|--------------------------------------------------------------------|
| a.a.              | NH    | H $\alpha$    | H $\beta$     | misc.                                                              |
| Phe <sup>1</sup>  | 7,909 | 4,512         | 3,091 ; 2,937 | 7,114 (H $\delta$ ); 7,006 (H $\epsilon$ ); 6,706 (H $\zeta$ )     |
| Gly <sup>2</sup>  | 8,232 | 3,507 ; 3,604 |               |                                                                    |
| Gly <sup>3</sup>  | 8,186 | 3,981 ; 3,742 |               |                                                                    |
| Phe <sup>4</sup>  | 7,864 | 4,564         | 3,236 ; 2,846 | 7,241 (H $\delta$ ); 7,090 (H $\epsilon$ ); 6,952(H $\zeta$ )      |
| Thr <sup>5</sup>  | 8,320 | 4,169         | 4,101         | 1,029(H $\gamma$ )                                                 |
| Gly <sup>6</sup>  | 8,341 | 4,162         |               |                                                                    |
| Ala <sup>7</sup>  | 7,836 | 3,928         | 1,220         |                                                                    |
| Arg <sup>8</sup>  | 8,176 | 4,147         | 1,683         | 1,536(H $\gamma$ ); 2,965(H $\delta$ ); 7,049(H $\epsilon$ )       |
| Lys <sup>9</sup>  | 7,769 | 3,991         | 1,651         | 1,261(H $\gamma$ ); 1,459(H $\delta$ ); 2,797(H $\epsilon$ )       |
| Ser <sup>10</sup> | 7,930 | 4,065         | 3,681         |                                                                    |
| Ala <sup>11</sup> | 7,745 | 4,003         | 1,258         |                                                                    |
| Arg <sup>12</sup> | 7,704 | 3,944         | 1,675         | 1,508(H $\gamma$ ); 2,976(H $\delta$ ); 7,031(H $\epsilon$ )       |
| Lys <sup>13</sup> | 7,783 | 3,809         | 1,683         | 1,242(H $\gamma$ ); 1,506(H $\delta$ ); 2,799(H $\epsilon$ )       |
| Leu <sup>14</sup> | 7,744 | 3,999         | 1,499         | 1,378(H $\gamma$ ); 0,687(H $\delta$ )                             |
| Ala <sup>15</sup> | 7,665 | 4,052         | 1,222         |                                                                    |
| Asn <sup>16</sup> | 7,851 | 4,545         | 2,681 ; 2,523 | 7,428(H $\delta$ 21); 6,727(H $\delta$ 22)                         |
| Gln <sup>17</sup> | 7,561 | 3,929         | 1,934 ; 1,731 | 2,129(H $\gamma$ ); 7,357(H $\epsilon$ 21); 6,658(H $\epsilon$ 22) |

**Table S6.** <sup>1</sup>H Chemical shift (p.p.m.) for (Ser<sup>10</sup>-O- $\alpha$ -D-GalNAc)-N/OFQ (**2**) in SDS micelles at 288K.

| (Ser <sup>10</sup> -O- $\alpha$ -D-GalNAc)-N/OFQ |       |               |               |                                                                    |
|--------------------------------------------------|-------|---------------|---------------|--------------------------------------------------------------------|
| a.a.                                             | NH    | H $\alpha$    | H $\beta$     | misc.                                                              |
| Phe <sup>1</sup>                                 |       | 4,164         | 2,968 ; 3,104 | 7,124(H $\delta$ ); 7,021(H $\epsilon$ ); 6,708(H $\zeta$ )        |
| Gly <sup>2</sup>                                 | 8,232 | 3,511 ; 3,603 |               |                                                                    |
| Gly <sup>3</sup>                                 | 8,241 | 4,004 ; 3,747 |               |                                                                    |
| Phe <sup>4</sup>                                 | 7,851 | 4,595         | 2,846 ; 3,275 | 7,269(H $\delta$ ); 7,111(H $\epsilon$ ); 6,955 (H $\zeta$ )       |
| Thr <sup>5</sup>                                 | 8,414 | 4,201         |               | 1,042(H $\gamma$ )                                                 |
| Gly <sup>6</sup>                                 | 8,390 | 4,202         |               |                                                                    |
| Ala <sup>7</sup>                                 | 7,786 | 3,965         | 1,227         |                                                                    |
| Arg <sup>8</sup>                                 | 8,198 | 3,958         | 1,692         | 1,514(H $\gamma$ ); 2,969(H $\delta$ ); 7,074(H $\epsilon$ )       |
| Lys <sup>9</sup>                                 | 7,767 | 3,789         | 1,650         | 1,256(H $\gamma$ ); 1,520(H $\delta$ ); 2,801(H $\epsilon$ )       |
| Ser <sup>10</sup>                                | 7,859 | 4,271         | 3,837         |                                                                    |
| Ala <sup>11</sup>                                | 7,910 | 3,939         | 1,287         |                                                                    |
| Arg <sup>12</sup>                                | 7,894 | 3,977         | 1,700         | 1,492(H $\gamma$ ); 2,989(H $\delta$ ); 7,029(H $\epsilon$ )       |
| Lys <sup>13</sup>                                | 7,775 | 4,002         | 1,669         | 1,292(H $\gamma$ ); 1,536(H $\delta$ ); 2,804(H $\epsilon$ )       |
| Leu <sup>14</sup>                                | 7,600 | 4,015         | 1,491         | 1,391(H $\gamma$ ); 0,708(H $\delta$ )                             |
| Ala <sup>15</sup>                                | 7,661 | 4,053         | 1,242         |                                                                    |
| Asn <sup>16</sup>                                | 7,823 | 4,562         | 2,699 ; 2,532 | 7,411(H $\delta$ 21); 6,736 (H $\delta$ 22)                        |
| Gln <sup>17</sup>                                | 7,543 | 3,930         | 1,947 ; 1,756 | 2,158(H $\gamma$ ); 7,368(H $\epsilon$ 21); 6,669(H $\epsilon$ 22) |

  

| sugar residue      | H1    | H2    | H3    | H4    | H5 | H6 <sub>1</sub> | H6 <sub>2</sub> | NHacetamide | CH <sub>3</sub> acetamide |
|--------------------|-------|-------|-------|-------|----|-----------------|-----------------|-------------|---------------------------|
| $\alpha$ -D-GalNAc | 4,662 | 3,982 | 3,632 | 3,774 |    | 3,691           | 3,426           | 8,049       | 1,823                     |

**Table S7.** <sup>1</sup>H Chemical shift (p.p.m.) for (Ser<sup>10</sup>-O-β-D-GlcNAc)-N/OFQ (**3**) in SDS micelles at 288K.

| (Ser <sup>10</sup> -O-β-D-GlcNAc)-N/OFQ |       |               |               |                                     |  |  |  |  |  |
|-----------------------------------------|-------|---------------|---------------|-------------------------------------|--|--|--|--|--|
| a.a.                                    | NH    | Hα            | Hβ            | misc.                               |  |  |  |  |  |
| Phe <sup>1</sup>                        |       | 4,159         | 2,956 ; 3,088 | 7,124(Hδ); 7,023(Hε); 6,734(Hζ)     |  |  |  |  |  |
| Gly <sup>2</sup>                        | 8,225 | 3,577         |               |                                     |  |  |  |  |  |
| Gly <sup>3</sup>                        | 8,141 | 3,971 ; 3,701 |               |                                     |  |  |  |  |  |
| Phe <sup>4</sup>                        | 7,862 | 4,571         | 3,226 ; 2,858 | 7,242(Hδ); 7,100(Hε); 6,957(Hζ)     |  |  |  |  |  |
| Thr <sup>5</sup>                        | 8,265 | 4,159         | 4,070         | 1,035(Hγ)                           |  |  |  |  |  |
| Gly <sup>6</sup>                        | 8,264 | 4,149         |               |                                     |  |  |  |  |  |
| Ala <sup>7</sup>                        | 7,805 | 4,083         | 1,233         |                                     |  |  |  |  |  |
| Arg <sup>8</sup>                        | 8,141 | 3,984         | 1,676         | 1,486(Hγ); 2,995(Hδ); 7,030(Hε)     |  |  |  |  |  |
| Lys <sup>9</sup>                        | 7,792 | 4,060         | 1,637         | 1,304(Hγ); 1,518(Hδ); 2,808 (Hε)    |  |  |  |  |  |
| Ser <sup>10</sup>                       | 8,004 | 4,187         | 3,925 ; 3,711 |                                     |  |  |  |  |  |
| Ala <sup>11</sup>                       | 7,788 | 3,988         | 1,227         |                                     |  |  |  |  |  |
| Arg <sup>12</sup>                       | 7,761 | 4,021         | 1,653         | 1,501(Hγ); 2,990(Hδ); 6,974(Hε)     |  |  |  |  |  |
| Lys <sup>13</sup>                       | 7,750 | 4,016         | 1,671         | 1,268(Hγ); 1,530(Hδ); 2,795(Hε)     |  |  |  |  |  |
| Leu <sup>14</sup>                       | 7,740 | 4,008         | 1,516         | 1,390(Hγ); 0,701(Hδ)                |  |  |  |  |  |
| Ala <sup>15</sup>                       | 7,675 | 4,073         | 1,218         |                                     |  |  |  |  |  |
| Asn <sup>16</sup>                       | 7,905 | 4,534         | 2,664 ; 2,524 | 7,415(Hδ21); 6,724(Hδ22)            |  |  |  |  |  |
| Gln <sup>17</sup>                       | 7,600 | 3,923         | 1,939 ; 1,746 | 2,117(Hγ); 7,350(Hε21); 6,653(Hε22) |  |  |  |  |  |

  

| sugar residue | H1    | H2    | H3    | H4    | H5    | H6 <sub>1</sub> | H6 <sub>2</sub> | NHacetamide | CH <sub>3</sub> acetamide |
|---------------|-------|-------|-------|-------|-------|-----------------|-----------------|-------------|---------------------------|
| β-D-GlcNAc    | 4,356 | 3,483 | 3,348 | 3,241 | 3,232 | 3,726           | 3,404           | 7,955       | 1,805                     |

**Table S8.** <sup>1</sup>H Chemical shift (p.p.m.) for (Thr<sup>5</sup>-O-α-D-GalNAc)-N/OFQ (**4**) in SDS micelles at 288K.

| (Thr <sup>5</sup> -O-α-D-GalNAc)-N/OFQ |        |        |              |                                     |
|----------------------------------------|--------|--------|--------------|-------------------------------------|
| a.a.                                   | NH     | Hα     | Hβ           | misc,                               |
| Phe <sup>1</sup>                       |        | 4,153  | 2,949; 3,091 | 7,129(Hδ); 6,759(Hε); 7,039(Hζ)     |
| Gly <sup>2</sup>                       | 8,212  | 3,590  |              |                                     |
| Gly <sup>3</sup>                       |        |        |              |                                     |
| Phe <sup>4</sup>                       | 7,909  | 4,606  | 2,927; 3,188 | 7,249(Hδ); 7,112(Hε); 6,977(Hζ)     |
| Thr <sup>5</sup>                       | 8,240  | 4,401  | 4,269        | 0,969(Hγ)                           |
| Gly <sup>6</sup>                       | 8,240* | 4,401* |              |                                     |
| Ala <sup>7</sup>                       | 8,163  | 4,121  | 1,216        |                                     |
| Arg <sup>8</sup>                       | 8,085  | 4,002  | 1,682        | 1,491(Hγ); 2,983(Hδ); 7,008(Hε)     |
| Lys <sup>9</sup>                       | 7,879  | 3,972  | 1,630        | 1,241(Hγ); 1,508(Hδ); 2,803(Hε)     |
| Ser <sup>10</sup>                      | 7,839  | 4,163  | 3,740; 3,656 |                                     |
| Ala <sup>11</sup>                      | 7,932  | 4,025  | 1,241        |                                     |
| Arg <sup>12</sup>                      | 7,783  | 3,975  | 1,655        | 1,500(Hγ); 3,015(Hδ); 7,000(Hε)     |
| Lys <sup>13</sup>                      | 7,800  | 4,065  | 1,642        | 1,255(Hγ); 1,504(Hδ); 2,801(Hε)     |
| Leu <sup>14</sup>                      | 7,770  | 4,010  | 1,513        | 1,376(Hγ); 0,699(Hδ)                |
| Ala <sup>15</sup>                      | 7,704  | 4,057  | 1,214        |                                     |
| Asn <sup>16</sup>                      | 7,921  | 4,534  | 2,677; 2,523 | 7,430(Hδ21); 6,725(Hδ22)            |
| Gln <sup>17</sup>                      | 7,623  | 3,923  | 1,942; 1,736 | 2,122(Hγ); 6,655(Hε21); 7,350(Hε22) |
| *overlapped                            |        |        |              |                                     |

  

| sugar residue | H1    | H2    | H3    | H4 | H5 | H6 <sub>1</sub> | H6 <sub>2</sub> | NHacetamide | CH <sub>3</sub> acetamide |
|---------------|-------|-------|-------|----|----|-----------------|-----------------|-------------|---------------------------|
| α-D-GalNAc    | 4,686 | 3,791 | 3,528 |    |    | 3,694           | 3,451           | 7,717       | 1,835                     |

**Table S9.** Statistics for the NMR solution structure of the peptides **1-4** in SDS micelles at 288K. Average values over the 20 conformers obtained by CYANA program.

| PARAMETER                               | PEPTIDE    |                            |                            |                                        |
|-----------------------------------------|------------|----------------------------|----------------------------|----------------------------------------|
|                                         | Nociceptin | (Ser10-O-α-D-GalNAc)-N/OFQ | (Ser10-O-β-D-GlcNAc)-N/OFQ | (Thr <sup>5</sup> -O-α-D-GalNAc)-N/OFQ |
|                                         | 1          | 2                          | 3                          | 4                                      |
| NOE cross-peaks                         |            |                            |                            |                                        |
| Assigned (%)                            | 95,1       |                            |                            |                                        |
| NOE upper distant limits                |            |                            |                            |                                        |
| Short-range,  i-j ≤1                    | 162        | 143                        | 139                        | 157                                    |
| Medium-range, 1< i-j <5                 | 36         | 45                         | 34                         | 20                                     |
| Long-range,  i-j ≥5                     | 6          | 0                          | 8                          | 7                                      |
| CYANA target function (Å <sup>2</sup> ) | 0,01       | 0,01                       | 0,03                       | 0,01                                   |
| Rmsd to mean co-ordinates (Å)           |            |                            |                            |                                        |
| Backbone                                | 1.69       | 2.68                       | 2.03                       | 2.76                                   |
| All heavy atoms                         | 2.11       | 3.59                       | 2.87                       | 3.47                                   |
| Ramachandran plot statistics (%)        |            |                            |                            |                                        |
| Residues in the most favoured           | 59,6       | 70                         | 57,9                       | 44,6                                   |
| Residues in the additionally            | 40         | 30                         | 42,1                       | 55                                     |
| Residues in the generously              | 0,4        | 0                          | 0                          | 0,4                                    |
| Residues in the disallowed              | 0          | 0                          | 0                          | 0                                      |

|                 | F <sup>1</sup> | G <sup>2</sup> | G <sup>3</sup> | F <sup>4</sup> | T <sup>5</sup> | G <sup>6</sup> | A <sup>7</sup> | R <sup>8</sup> | K <sup>9</sup> | S <sup>10</sup> | A <sup>11</sup> | R <sup>12</sup> | K <sup>13</sup> | L <sup>14</sup> | A <sup>15</sup> | N <sup>16</sup> | Q <sup>17</sup> |   |
|-----------------|----------------|----------------|----------------|----------------|----------------|----------------|----------------|----------------|----------------|-----------------|-----------------|-----------------|-----------------|-----------------|-----------------|-----------------|-----------------|---|
| F <sup>1</sup>  | ■              |                |                |                |                |                |                |                |                |                 |                 |                 |                 |                 |                 |                 |                 |   |
| G <sup>2</sup>  |                | ■              |                |                |                |                |                |                |                |                 |                 |                 |                 |                 |                 |                 |                 |   |
| G <sup>3</sup>  |                |                | ■              | ■              |                |                |                |                |                |                 |                 |                 |                 |                 |                 |                 |                 |   |
| F <sup>4</sup>  |                |                |                | ■              | ■              |                |                |                |                |                 |                 |                 |                 |                 |                 |                 |                 |   |
| T <sup>5</sup>  |                |                |                |                | ■              | ■              | ■              |                |                |                 |                 |                 |                 |                 |                 |                 |                 |   |
| G <sup>6</sup>  |                |                |                |                | ■              | ■              | ■              | ■              |                |                 |                 |                 |                 |                 |                 |                 |                 |   |
| A <sup>7</sup>  |                |                |                |                | ■              | ■              | ■              | ■              |                |                 |                 |                 |                 |                 |                 |                 |                 |   |
| R <sup>8</sup>  |                |                |                |                |                |                |                | ■              | ■              |                 |                 |                 |                 |                 |                 |                 |                 |   |
| K <sup>9</sup>  |                |                |                |                |                |                |                |                | ■              |                 |                 |                 |                 |                 |                 |                 |                 |   |
| S <sup>10</sup> |                |                |                |                |                |                |                |                |                | ■               | ■               |                 |                 |                 |                 |                 |                 |   |
| A <sup>11</sup> |                |                |                |                |                |                |                |                |                | ■               | ■               |                 |                 |                 |                 |                 |                 |   |
| R <sup>12</sup> |                |                |                |                |                |                |                |                |                |                 |                 | ■               |                 |                 |                 |                 |                 | ■ |
| K <sup>13</sup> |                |                |                |                |                |                |                |                |                |                 |                 |                 | ■               |                 |                 |                 |                 | ■ |
| L <sup>14</sup> |                |                |                |                |                |                |                |                |                |                 |                 |                 |                 | ■               | ■               | ■               | ■               | ■ |
| A <sup>15</sup> |                |                |                |                |                |                |                |                |                |                 |                 |                 |                 |                 | ■               | ■               | ■               | ■ |
| N <sup>16</sup> |                |                |                |                |                |                |                |                |                |                 |                 |                 |                 |                 | ■               | ■               | ■               | ■ |
| Q <sup>17</sup> |                |                |                |                |                |                |                |                |                |                 |                 | ■               | ■               | ■               | ■               | ■               | ■               | ■ |

**Fig. S1.** Inter-residual NOEs observed on NH region from NOESY spectrum (T=278K, 300ms) for nociceptin in water solution.

|                 | F <sup>1</sup> | G <sup>2</sup> | G <sup>3</sup> | F <sup>4</sup> | T <sup>5</sup> | G <sup>6</sup> | A <sup>7</sup> | R <sup>8</sup> | K <sup>9</sup> | S <sup>10</sup> | A <sup>11</sup> | R <sup>12</sup> | K <sup>13</sup> | L <sup>14</sup> | A <sup>15</sup> | N <sup>16</sup> | Q <sup>17</sup> |   |
|-----------------|----------------|----------------|----------------|----------------|----------------|----------------|----------------|----------------|----------------|-----------------|-----------------|-----------------|-----------------|-----------------|-----------------|-----------------|-----------------|---|
| F <sup>1</sup>  | ■              |                |                |                | ■              |                |                |                |                |                 |                 |                 |                 |                 |                 |                 |                 |   |
| G <sup>2</sup>  |                | ■              |                |                |                |                |                |                |                |                 |                 |                 |                 |                 |                 |                 |                 |   |
| G <sup>3</sup>  |                |                | ■              | ■              |                |                |                |                |                |                 |                 |                 |                 |                 |                 |                 |                 |   |
| F <sup>4</sup>  |                |                |                | ■              | ■              |                |                |                |                |                 |                 |                 |                 |                 |                 |                 |                 |   |
| T <sup>5</sup>  |                |                |                |                | ■              | ■              | ■              | ■              |                |                 |                 |                 |                 |                 |                 |                 |                 |   |
| G <sup>6</sup>  |                |                |                |                | ■              | ■              | ■              | ■              |                |                 |                 |                 |                 |                 |                 |                 |                 |   |
| A <sup>7</sup>  |                |                |                |                | ■              | ■              | ■              | ■              |                |                 |                 |                 |                 |                 |                 |                 |                 |   |
| R <sup>8</sup>  |                |                |                |                | ■              |                |                | ■              | ■              |                 |                 |                 |                 |                 |                 |                 |                 |   |
| K <sup>9</sup>  |                |                |                |                |                |                |                | ■              | ■              |                 |                 |                 |                 |                 |                 |                 |                 |   |
| S <sup>10</sup> |                |                |                |                |                |                |                |                |                | ■               | ■               |                 |                 |                 |                 |                 |                 |   |
| A <sup>11</sup> |                |                |                |                |                |                |                |                |                | ■               | ■               |                 |                 |                 |                 |                 |                 |   |
| R <sup>12</sup> |                |                |                |                |                |                |                |                |                |                 |                 | ■               |                 |                 |                 |                 |                 | ■ |
| K <sup>13</sup> |                |                |                |                |                |                |                |                |                |                 |                 |                 | ■               | ■               | ■               | ■               | ■               | ■ |
| L <sup>14</sup> |                |                |                |                |                |                |                |                |                |                 |                 |                 |                 | ■               | ■               | ■               | ■               | ■ |
| A <sup>15</sup> |                |                |                |                |                |                |                |                |                |                 |                 |                 |                 |                 | ■               | ■               | ■               | ■ |
| N <sup>16</sup> |                |                |                |                |                |                |                |                |                |                 |                 |                 |                 |                 | ■               | ■               | ■               | ■ |
| Q <sup>17</sup> |                |                |                |                |                |                |                |                |                |                 |                 | ■               | ■               | ■               | ■               | ■               | ■               | ■ |

**Fig. S2.** Inter-residual NOEs observed on NH region from NOESY spectrum (T=278K, 300ms) for (Thr<sup>5</sup>-O- $\alpha$ -D-GalNAc)-N/OFQ (**1**) in water solution.

|                 | F <sup>1</sup> | G <sup>2</sup> | G <sup>3</sup> | F <sup>4</sup> | T <sup>5</sup> | G <sup>6</sup> | A <sup>7</sup> | R <sup>8</sup> | K <sup>9</sup> | S <sup>10</sup> | A <sup>11</sup> | R <sup>12</sup> | K <sup>13</sup> | L <sup>14</sup> | A <sup>15</sup> | N <sup>16</sup> | Q <sup>17</sup> |  |
|-----------------|----------------|----------------|----------------|----------------|----------------|----------------|----------------|----------------|----------------|-----------------|-----------------|-----------------|-----------------|-----------------|-----------------|-----------------|-----------------|--|
| F <sup>1</sup>  |                |                |                |                |                |                |                |                |                |                 |                 |                 |                 |                 |                 |                 |                 |  |
| G <sup>2</sup>  |                |                |                |                |                |                |                |                |                |                 |                 |                 |                 |                 |                 |                 |                 |  |
| G <sup>3</sup>  |                |                |                |                |                |                |                |                |                |                 |                 |                 |                 |                 |                 |                 |                 |  |
| F <sup>4</sup>  |                |                |                |                |                |                |                |                |                |                 |                 |                 |                 |                 |                 |                 |                 |  |
| T <sup>5</sup>  |                |                |                |                |                |                |                |                |                |                 |                 |                 |                 |                 |                 |                 |                 |  |
| G <sup>6</sup>  |                |                |                |                |                |                |                |                |                |                 |                 |                 |                 |                 |                 |                 |                 |  |
| A <sup>7</sup>  |                |                |                |                |                |                |                |                |                |                 |                 |                 |                 |                 |                 |                 |                 |  |
| R <sup>8</sup>  |                |                |                |                |                |                |                |                |                |                 |                 |                 |                 |                 |                 |                 |                 |  |
| K <sup>9</sup>  |                |                |                |                |                |                |                |                |                |                 |                 |                 |                 |                 |                 |                 |                 |  |
| S <sup>10</sup> |                |                |                |                |                |                |                |                |                |                 |                 |                 |                 |                 |                 |                 |                 |  |
| A <sup>11</sup> |                |                |                |                |                |                |                |                |                |                 |                 |                 |                 |                 |                 |                 |                 |  |
| R <sup>12</sup> |                |                |                |                |                |                |                |                |                |                 |                 |                 |                 |                 |                 |                 |                 |  |
| K <sup>13</sup> |                |                |                |                |                |                |                |                |                |                 |                 |                 |                 |                 |                 |                 |                 |  |
| L <sup>14</sup> |                |                |                |                |                |                |                |                |                |                 |                 |                 |                 |                 |                 |                 |                 |  |
| A <sup>15</sup> |                |                |                |                |                |                |                |                |                |                 |                 |                 |                 |                 |                 |                 |                 |  |
| N <sup>16</sup> |                |                |                |                |                |                |                |                |                |                 |                 |                 |                 |                 |                 |                 |                 |  |
| Q <sup>17</sup> |                |                |                |                |                |                |                |                |                |                 |                 |                 |                 |                 |                 |                 |                 |  |

**Fig. S3.** Inter-residual NOEs observed on NH region from NOESY spectrum (T=278K, 300ms) for (Ser<sup>10</sup>-O- $\alpha$ -D-GalNAc)-N/OFQ (**2**) in water solution.

|                 | F <sup>1</sup> | G <sup>2</sup> | G <sup>3</sup> | F <sup>4</sup> | T <sup>5</sup> | G <sup>6</sup> | A <sup>7</sup> | R <sup>8</sup> | K <sup>9</sup> | S <sup>10</sup> | A <sup>11</sup> | R <sup>12</sup> | K <sup>13</sup> | L <sup>14</sup> | A <sup>15</sup> | N <sup>16</sup> | Q <sup>17</sup> |  |
|-----------------|----------------|----------------|----------------|----------------|----------------|----------------|----------------|----------------|----------------|-----------------|-----------------|-----------------|-----------------|-----------------|-----------------|-----------------|-----------------|--|
| F <sup>1</sup>  |                |                |                |                |                |                |                |                |                |                 |                 |                 |                 |                 |                 |                 |                 |  |
| G <sup>2</sup>  |                |                |                |                |                |                |                |                |                |                 |                 |                 |                 |                 |                 |                 |                 |  |
| G <sup>3</sup>  |                |                |                |                |                |                |                |                |                |                 |                 |                 |                 |                 |                 |                 |                 |  |
| F <sup>4</sup>  |                |                |                |                |                |                |                |                |                |                 |                 |                 |                 |                 |                 |                 |                 |  |
| T <sup>5</sup>  |                |                |                |                |                |                |                |                |                |                 |                 |                 |                 |                 |                 |                 |                 |  |
| G <sup>6</sup>  |                |                |                |                |                |                |                |                |                |                 |                 |                 |                 |                 |                 |                 |                 |  |
| A <sup>7</sup>  |                |                |                |                |                |                |                |                |                |                 |                 |                 |                 |                 |                 |                 |                 |  |
| R <sup>8</sup>  |                |                |                |                |                |                |                |                |                |                 |                 |                 |                 |                 |                 |                 |                 |  |
| K <sup>9</sup>  |                |                |                |                |                |                |                |                |                |                 |                 |                 |                 |                 |                 |                 |                 |  |
| S <sup>10</sup> |                |                |                |                |                |                |                |                |                |                 |                 |                 |                 |                 |                 |                 |                 |  |
| A <sup>11</sup> |                |                |                |                |                |                |                |                |                |                 |                 |                 |                 |                 |                 |                 |                 |  |
| R <sup>12</sup> |                |                |                |                |                |                |                |                |                |                 |                 |                 |                 |                 |                 |                 |                 |  |
| K <sup>13</sup> |                |                |                |                |                |                |                |                |                |                 |                 |                 |                 |                 |                 |                 |                 |  |
| L <sup>14</sup> |                |                |                |                |                |                |                |                |                |                 |                 |                 |                 |                 |                 |                 |                 |  |
| A <sup>15</sup> |                |                |                |                |                |                |                |                |                |                 |                 |                 |                 |                 |                 |                 |                 |  |
| N <sup>16</sup> |                |                |                |                |                |                |                |                |                |                 |                 |                 |                 |                 |                 |                 |                 |  |
| Q <sup>17</sup> |                |                |                |                |                |                |                |                |                |                 |                 |                 |                 |                 |                 |                 |                 |  |

**Fig. S4.** Inter-residual NOEs observed on NH region from NOESY spectrum (T=278K, 300ms) for (Ser<sup>10</sup>-O- $\beta$ -D-GlcNAc)-N/OFQ (**3**) in water solution.

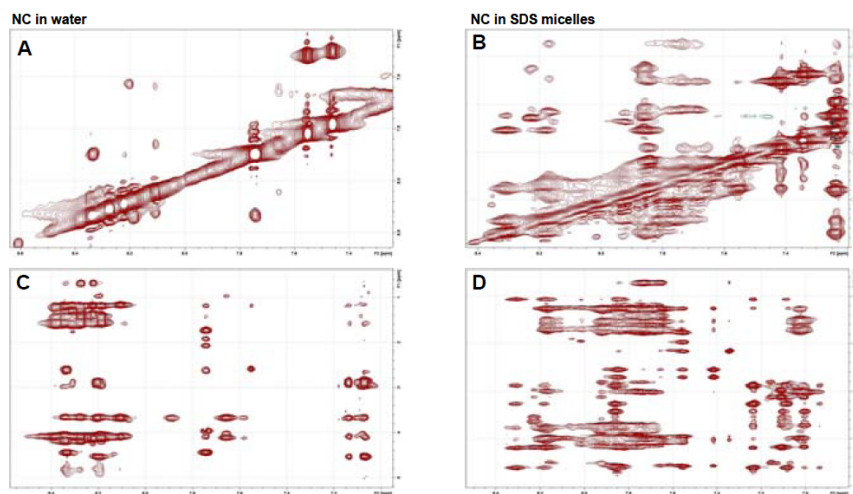

**Fig. S5.** NH-NH (A and B) and NH- $\alpha$ H (C and D) regions from NOESY spectra for nociceptin (1) in water and in presence of SDS.



|                 | F <sup>1</sup> | G <sup>2</sup> | G <sup>3</sup> | F <sup>4</sup> | T <sup>5</sup> | G <sup>6</sup> | A <sup>7</sup> | R <sup>8</sup> | K <sup>9</sup> | S <sup>10</sup> | A <sup>11</sup> | R <sup>12</sup> | K <sup>13</sup> | L <sup>14</sup> | A <sup>15</sup> | N <sup>16</sup> | Q <sup>17</sup> |   |
|-----------------|----------------|----------------|----------------|----------------|----------------|----------------|----------------|----------------|----------------|-----------------|-----------------|-----------------|-----------------|-----------------|-----------------|-----------------|-----------------|---|
| F <sup>1</sup>  | ■              | ■              |                |                |                |                |                |                |                |                 |                 |                 |                 |                 |                 |                 |                 |   |
| G <sup>2</sup>  | ■              | ■              |                |                | ■              |                |                |                |                |                 |                 |                 |                 |                 |                 |                 |                 |   |
| G <sup>3</sup>  |                |                | ■              |                |                |                | ■              |                |                |                 |                 |                 |                 |                 |                 |                 |                 |   |
| F <sup>4</sup>  |                |                | ■              | ■              | ■              | ■              | ■              |                |                |                 |                 |                 |                 |                 |                 |                 |                 |   |
| T <sup>5</sup>  |                | ■              | ■              | ■              | ■              | ■              | ■              | ■              |                |                 |                 |                 |                 |                 |                 |                 |                 |   |
| G <sup>6</sup>  |                |                | ■              | ■              | ■              | ■              |                |                |                |                 |                 |                 |                 |                 |                 |                 |                 |   |
| A <sup>7</sup>  |                |                | ■              |                | ■              |                | ■              | ■              | ■              | ■               |                 |                 |                 |                 |                 |                 |                 |   |
| R <sup>8</sup>  |                |                |                |                | ■              |                | ■              | ■              | ■              | ■               |                 |                 |                 |                 |                 |                 |                 |   |
| K <sup>9</sup>  |                |                |                |                |                |                | ■              | ■              | ■              | ■               |                 |                 |                 |                 |                 |                 |                 |   |
| S <sup>10</sup> |                |                |                |                |                |                | ■              | ■              | ■              | ■               | ■               | ■               |                 |                 |                 |                 |                 |   |
| A <sup>11</sup> |                |                |                |                |                |                |                |                |                | ■               | ■               |                 |                 |                 |                 |                 |                 |   |
| R <sup>12</sup> |                |                |                |                |                |                |                |                |                | ■               |                 | ■               | ■               |                 |                 |                 |                 |   |
| K <sup>13</sup> |                |                |                |                |                |                |                |                |                |                 |                 | ■               | ■               | ■               | ■               | ■               | ■               |   |
| L <sup>14</sup> |                |                |                |                |                |                |                |                |                |                 |                 |                 | ■               | ■               | ■               | ■               | ■               | ■ |
| A <sup>15</sup> |                |                |                |                |                |                |                |                |                |                 |                 |                 | ■               | ■               | ■               | ■               | ■               | ■ |
| N <sup>16</sup> |                |                |                |                |                |                |                |                |                |                 |                 |                 | ■               |                 | ■               | ■               | ■               | ■ |
| Q <sup>17</sup> |                |                |                |                |                |                |                |                |                |                 |                 |                 |                 | ■               | ■               | ■               | ■               | ■ |

**Fig. S6.** Inter-residual NOEs observed on NH region from NOESY spectrum (T=288K, 300ms) for nociceptin in SDS micelles.

|                 | F <sup>1</sup> | G <sup>2</sup> | G <sup>3</sup> | F <sup>4</sup> | T <sup>5</sup> | G <sup>6</sup> | A <sup>7</sup> | R <sup>8</sup> | K <sup>9</sup> | S <sup>10</sup> | A <sup>11</sup> | R <sup>12</sup> | K <sup>13</sup> | L <sup>14</sup> | A <sup>15</sup> | N <sup>16</sup> | Q <sup>17</sup> |   |
|-----------------|----------------|----------------|----------------|----------------|----------------|----------------|----------------|----------------|----------------|-----------------|-----------------|-----------------|-----------------|-----------------|-----------------|-----------------|-----------------|---|
| F <sup>1</sup>  | ■              | ■              |                |                | ■              |                |                |                |                |                 |                 |                 |                 |                 |                 |                 |                 |   |
| G <sup>2</sup>  | ■              | ■              |                | ■              |                |                |                |                |                |                 |                 |                 |                 |                 |                 |                 |                 | ■ |
| G <sup>3</sup>  |                |                | ■              |                |                |                |                |                |                |                 |                 |                 |                 |                 |                 |                 |                 |   |
| F <sup>4</sup>  |                | ■              | ■              | ■              | ■              | ■              | ■              |                |                |                 |                 |                 |                 |                 |                 |                 |                 |   |
| T <sup>5</sup>  | ■              |                | ■              | ■              | ■              | ■              | ■              | ■              |                |                 |                 |                 |                 |                 |                 |                 |                 | ■ |
| G <sup>6</sup>  |                |                |                |                | ■              | ■              |                |                |                |                 |                 |                 |                 |                 |                 |                 |                 |   |
| A <sup>7</sup>  |                |                |                | ■              | ■              |                | ■              | ■              | ■              |                 |                 |                 |                 |                 |                 |                 |                 | ■ |
| R <sup>8</sup>  |                |                |                |                | ■              |                | ■              | ■              | ■              |                 |                 |                 |                 |                 |                 |                 |                 |   |
| K <sup>9</sup>  |                |                |                |                |                |                | ■              | ■              | ■              | ■               |                 |                 |                 |                 |                 |                 |                 |   |
| S <sup>10</sup> |                |                |                |                |                |                |                |                | ■              | ■               | ■               |                 |                 |                 | ■               |                 |                 |   |
| A <sup>11</sup> |                |                |                |                |                |                |                |                |                | ■               | ■               | ■               |                 |                 |                 |                 |                 |   |
| R <sup>12</sup> |                |                |                |                |                |                |                |                |                | ■               | ■               | ■               | ■               |                 |                 |                 |                 |   |
| K <sup>13</sup> |                |                |                |                |                |                |                |                |                |                 | ■               | ■               | ■               | ■               | ■               | ■               | ■               |   |
| L <sup>14</sup> |                |                |                |                |                |                |                |                |                | ■               |                 |                 | ■               | ■               | ■               | ■               | ■               | ■ |
| A <sup>15</sup> |                |                |                |                |                |                |                |                |                |                 |                 |                 | ■               | ■               | ■               | ■               | ■               | ■ |
| N <sup>16</sup> |                |                |                |                |                |                |                |                |                |                 |                 |                 |                 | ■               | ■               | ■               | ■               | ■ |
| Q <sup>17</sup> |                | ■              |                |                | ■              |                | ■              |                |                |                 |                 |                 |                 | ■               | ■               | ■               | ■               | ■ |

**Fig. S7.** Inter-residual NOEs observed on NH region from NOESY spectrum (T=278K, 300ms) for (Thr<sup>5</sup>-O- $\alpha$ -D-GalNAc)-N/OFQ (**1**) in water solution.

|                 | F <sup>1</sup> | G <sup>2</sup> | G <sup>3</sup> | F <sup>4</sup> | T <sup>5</sup> | G <sup>6</sup> | A <sup>7</sup> | R <sup>8</sup> | K <sup>9</sup> | S <sup>10</sup> | A <sup>11</sup> | R <sup>12</sup> | K <sup>13</sup> | L <sup>14</sup> | A <sup>15</sup> | N <sup>16</sup> | Q <sup>17</sup> |  |
|-----------------|----------------|----------------|----------------|----------------|----------------|----------------|----------------|----------------|----------------|-----------------|-----------------|-----------------|-----------------|-----------------|-----------------|-----------------|-----------------|--|
| F <sup>1</sup>  |                |                |                |                |                |                |                |                |                |                 |                 |                 |                 |                 |                 |                 |                 |  |
| G <sup>2</sup>  |                |                |                |                |                |                |                |                |                |                 |                 |                 |                 |                 |                 |                 |                 |  |
| G <sup>3</sup>  |                |                |                |                |                |                |                |                |                |                 |                 |                 |                 |                 |                 |                 |                 |  |
| F <sup>4</sup>  |                |                |                |                |                |                |                |                |                |                 |                 |                 |                 |                 |                 |                 |                 |  |
| T <sup>5</sup>  |                |                |                |                |                |                |                |                |                |                 |                 |                 |                 |                 |                 |                 |                 |  |
| G <sup>6</sup>  |                |                |                |                |                |                |                |                |                |                 |                 |                 |                 |                 |                 |                 |                 |  |
| A <sup>7</sup>  |                |                |                |                |                |                |                |                |                |                 |                 |                 |                 |                 |                 |                 |                 |  |
| R <sup>8</sup>  |                |                |                |                |                |                |                |                |                |                 |                 |                 |                 |                 |                 |                 |                 |  |
| K <sup>9</sup>  |                |                |                |                |                |                |                |                |                |                 |                 |                 |                 |                 |                 |                 |                 |  |
| S <sup>10</sup> |                |                |                |                |                |                |                |                |                |                 |                 |                 |                 |                 |                 |                 |                 |  |
| A <sup>11</sup> |                |                |                |                |                |                |                |                |                |                 |                 |                 |                 |                 |                 |                 |                 |  |
| R <sup>12</sup> |                |                |                |                |                |                |                |                |                |                 |                 |                 |                 |                 |                 |                 |                 |  |
| K <sup>13</sup> |                |                |                |                |                |                |                |                |                |                 |                 |                 |                 |                 |                 |                 |                 |  |
| L <sup>14</sup> |                |                |                |                |                |                |                |                |                |                 |                 |                 |                 |                 |                 |                 |                 |  |
| A <sup>15</sup> |                |                |                |                |                |                |                |                |                |                 |                 |                 |                 |                 |                 |                 |                 |  |
| N <sup>16</sup> |                |                |                |                |                |                |                |                |                |                 |                 |                 |                 |                 |                 |                 |                 |  |
| Q <sup>17</sup> |                |                |                |                |                |                |                |                |                |                 |                 |                 |                 |                 |                 |                 |                 |  |

**Fig. S8.** Inter-residual NOEs observed on NH region from NOESY spectrum (T=288K, 300ms) for (Ser<sup>10</sup>-O- $\alpha$ -D-GalNAc)-N/OFQ (**2**) in SDS micelles.

|                 | F <sup>1</sup> | G <sup>2</sup> | G <sup>3</sup> | F <sup>4</sup> | T <sup>5</sup> | G <sup>6</sup> | A <sup>7</sup> | R <sup>8</sup> | K <sup>9</sup> | S <sup>10</sup> | A <sup>11</sup> | R <sup>12</sup> | K <sup>13</sup> | L <sup>14</sup> | A <sup>15</sup> | N <sup>16</sup> | Q <sup>17</sup> |  |
|-----------------|----------------|----------------|----------------|----------------|----------------|----------------|----------------|----------------|----------------|-----------------|-----------------|-----------------|-----------------|-----------------|-----------------|-----------------|-----------------|--|
| F <sup>1</sup>  |                |                |                |                |                |                |                |                |                |                 |                 |                 |                 |                 |                 |                 |                 |  |
| G <sup>2</sup>  |                |                |                |                |                |                |                |                |                |                 |                 |                 |                 |                 |                 |                 |                 |  |
| G <sup>3</sup>  |                |                |                |                |                |                |                |                |                |                 |                 |                 |                 |                 |                 |                 |                 |  |
| F <sup>4</sup>  |                |                |                |                |                |                |                |                |                |                 |                 |                 |                 |                 |                 |                 |                 |  |
| T <sup>5</sup>  |                |                |                |                |                |                |                |                |                |                 |                 |                 |                 |                 |                 |                 |                 |  |
| G <sup>6</sup>  |                |                |                |                |                |                |                |                |                |                 |                 |                 |                 |                 |                 |                 |                 |  |
| A <sup>7</sup>  |                |                |                |                |                |                |                |                |                |                 |                 |                 |                 |                 |                 |                 |                 |  |
| R <sup>8</sup>  |                |                |                |                |                |                |                |                |                |                 |                 |                 |                 |                 |                 |                 |                 |  |
| K <sup>9</sup>  |                |                |                |                |                |                |                |                |                |                 |                 |                 |                 |                 |                 |                 |                 |  |
| S <sup>10</sup> |                |                |                |                |                |                |                |                |                |                 |                 |                 |                 |                 |                 |                 |                 |  |
| A <sup>11</sup> |                |                |                |                |                |                |                |                |                |                 |                 |                 |                 |                 |                 |                 |                 |  |
| R <sup>12</sup> |                |                |                |                |                |                |                |                |                |                 |                 |                 |                 |                 |                 |                 |                 |  |
| K <sup>13</sup> |                |                |                |                |                |                |                |                |                |                 |                 |                 |                 |                 |                 |                 |                 |  |
| L <sup>14</sup> |                |                |                |                |                |                |                |                |                |                 |                 |                 |                 |                 |                 |                 |                 |  |
| A <sup>15</sup> |                |                |                |                |                |                |                |                |                |                 |                 |                 |                 |                 |                 |                 |                 |  |
| N <sup>16</sup> |                |                |                |                |                |                |                |                |                |                 |                 |                 |                 |                 |                 |                 |                 |  |
| Q <sup>17</sup> |                |                |                |                |                |                |                |                |                |                 |                 |                 |                 |                 |                 |                 |                 |  |

**Fig. S9.** Inter-residual NOEs observed on NH region from NOESY spectrum (T=288K, 300ms) for (Ser<sup>10</sup>-O- $\beta$ -D-GlcNAc)-N/OFQ (**3**) in SDS micelles.

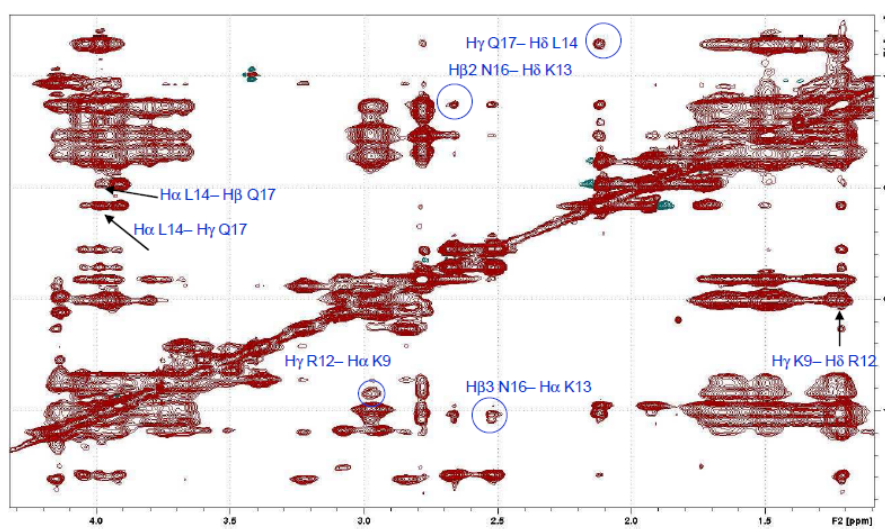

**Fig S10.** Aliphatic region from 600MHz NOESY (T=288K, 300 ms) spectrum for nociceptin. The NOEs (in blue) support the presence of a helical structure. Nociceptin (**1**) at 2mM with SDS solution at 132mM.

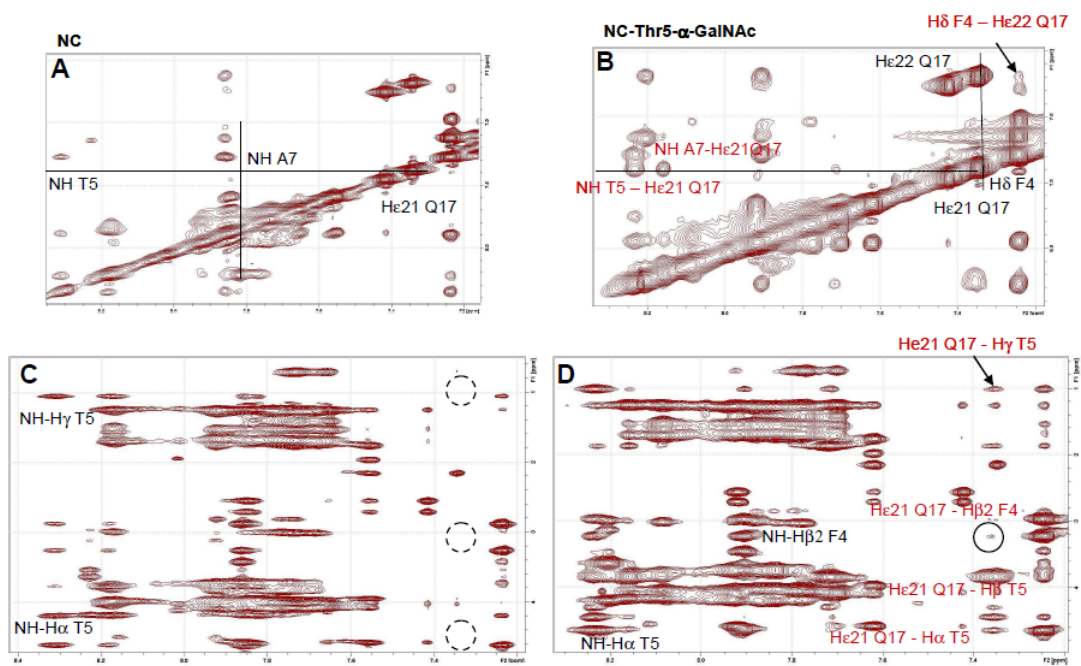

**Fig S11.** Selected regions from 600MHz NOESY spectra (T=288K, 300ms) for nociceptin (A and C) and (Thr<sup>5</sup>-O- $\alpha$ -D-GalNAc)-N/OFQ (B and D). Remote NOEs contacts displayed in red (B and D) were observed in the case of (Thr<sup>5</sup>-O- $\alpha$ -D-GalNAc)-N/OFQ. However, these remote contacts were not detected either in the case of nociceptin (A and C) and the others glycopeptides (data not shown).

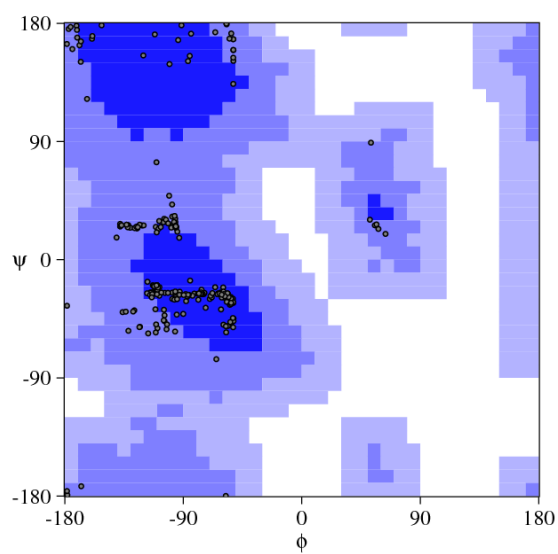

**Fig S12.** Ramachandran plot obtained by CYANA program for nociceptin (**1**) in SDS micelles.

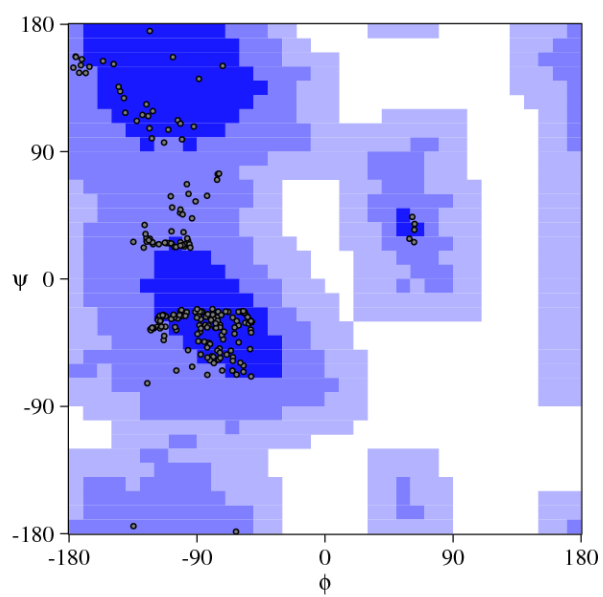

**Fig S13.** Ramachandran plot obtained by CYANA program for (Ser<sup>10</sup>-O- $\alpha$ -D-GalNAc)-N/OFQ (2) in SDS micelles.

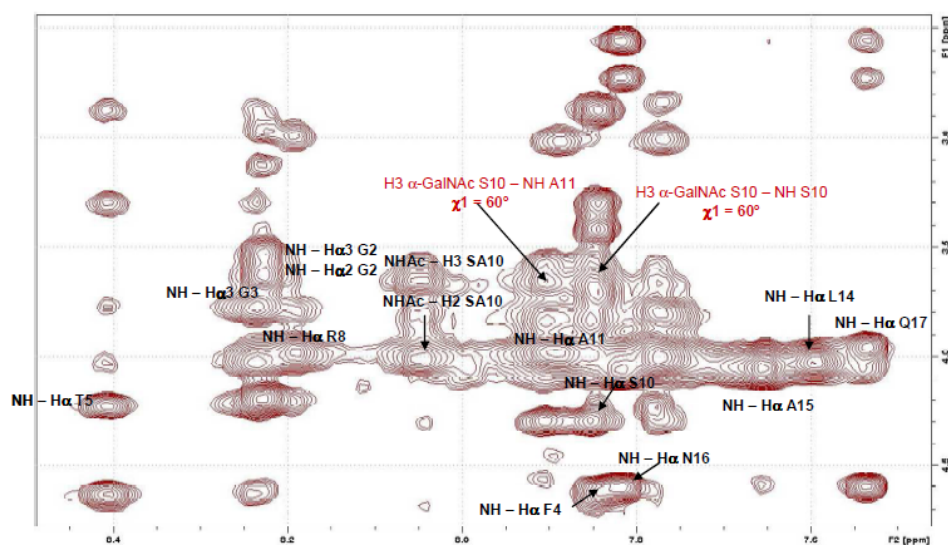

**Fig S14.** H $\alpha$ -NH region from 600MHz NOESY (T=288K, 300 ms) spectrum for (Ser<sup>10</sup>-O- $\alpha$ -D-GalNAc)-N/OFQ (**2**). The assignment for some residues are shown, as well as the key NOEs (in red) that indicates the presence of the structure with  $\chi_1 = 60^\circ$  ( $\chi_1 = \text{N2-C}\alpha\text{-C}\beta\text{-O1}$ ). Glycopeptide at 2mM with SDS solution at 132mM.

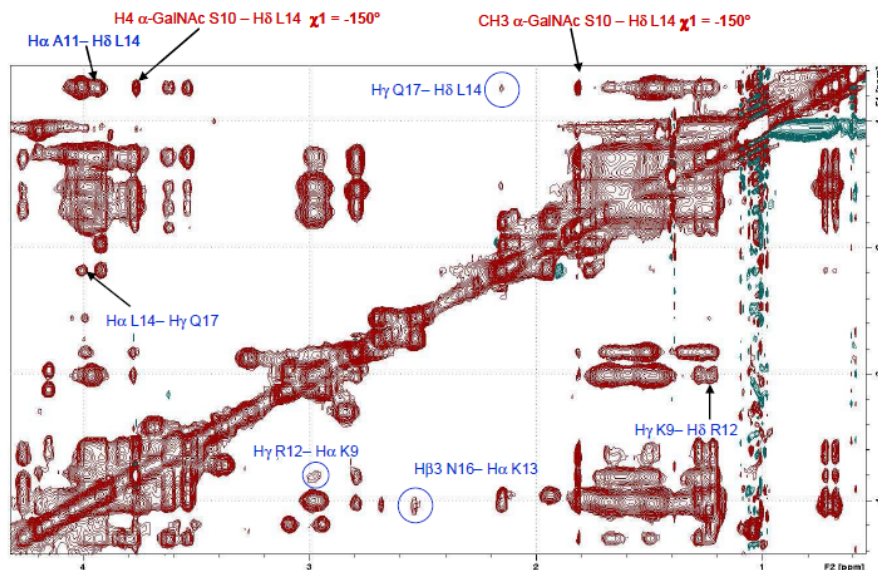

**Fig S15.** Aliphatic region from 600MHz NOESY (T=288K, 300 ms) spectrum for (Ser<sup>10</sup>-O- $\alpha$ -D-GalNAc)-N/OFQ (**2**). The key NOEs (in red) indicate the presence of the structure with  $\chi_1 = -150^\circ$  ( $\chi_1 = \text{N2-C}\alpha\text{-C}\beta\text{-O1}$ ), as well as, some of the NOEs (in blue) that support the presence of a helical structure. Glycopeptide at 2mM with SDS solution at 132mM.

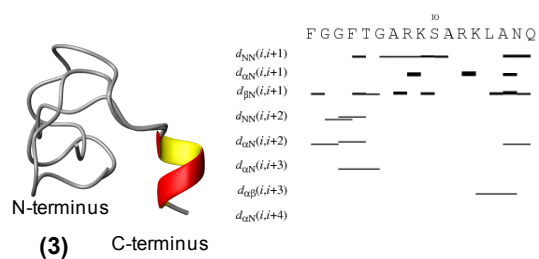

**Fig S16.** Superposition of 3 selected structures, NOE connectivities and H $\alpha$  chemical shift index (CSI) for (Ser<sup>10</sup>-O-β-D-GlcNAc)-N/OFQ (3).

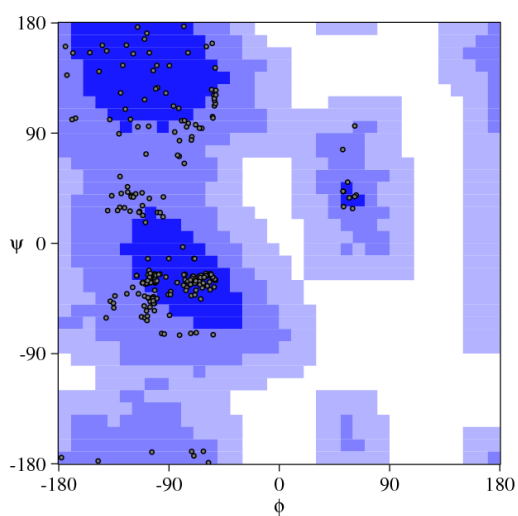

**Fig S17.** Ramachandran plot obtained by CYANA program for (Ser<sup>10</sup>-O-β-D-GlcNAc)-N/OFQ (3) in SDS micelles.



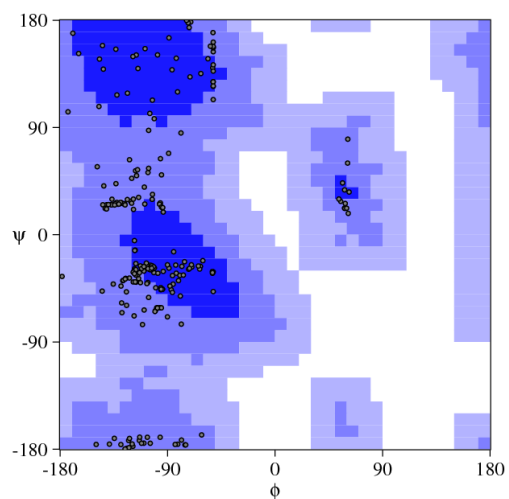

**Fig S18.** Ramachandran plot obtained by CYANA program for (Thr<sup>5</sup>-O- $\alpha$ -D-GalNAc)-N/OFQ (**4**) in SDS micelles.

## CIRCULAR DICHROISM

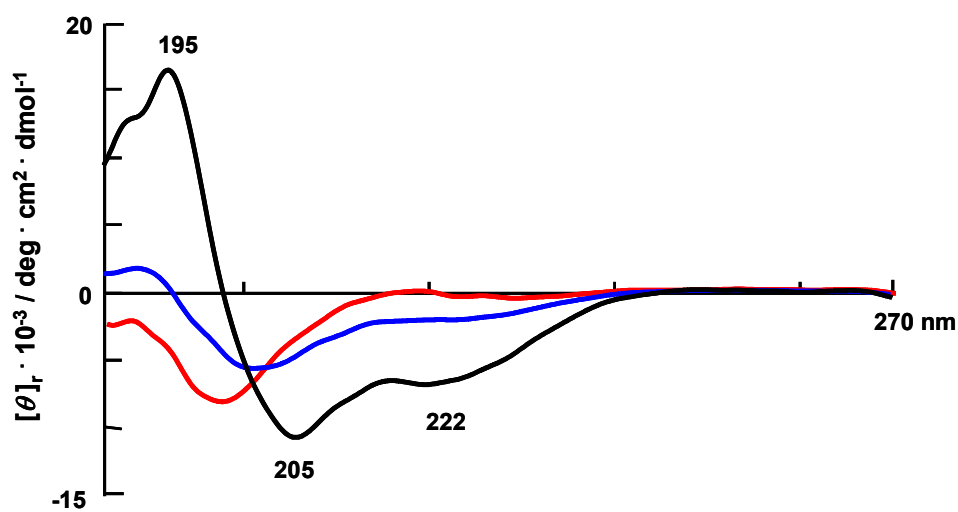

**Figure S19.** CD spectra of glycopeptide 1 ([Thr<sup>5</sup>-O- $\alpha$ -D-GalNAc]-N/OFQ) in TFE (black color), TFE-water (1:1) (blue), and water (red).

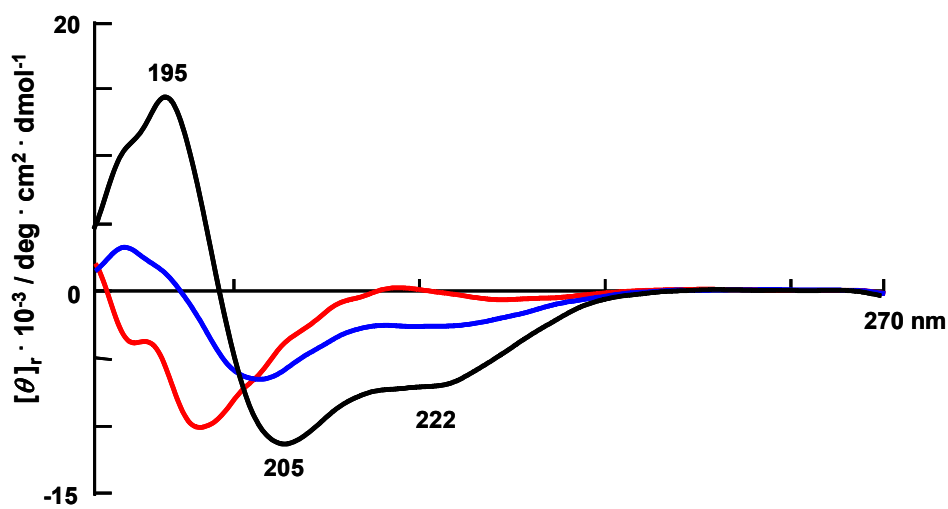

**Figure S20.** CD spectra of glycopeptide 2 ([Ser<sup>10</sup>-O- $\alpha$ -D-GalNAc]-N/OFQ) in TFE (black color), TFE-water (1:1) (blue), and water (red).

HPLC

|   |                                                                                                                                   |                                                                  |
|---|-----------------------------------------------------------------------------------------------------------------------------------|------------------------------------------------------------------|
| 1 | H-Phe-Gly-Gly-Phe- <i>Thr</i> <sup>5</sup> -( $\alpha$ -GalNAc)-Gly-Ala-Arg-Lys-Ser <sup>10</sup> -Ala-Arg-Lys-Leu-Ala-Asn-Gln-OH | [ <i>Thr</i> <sup>5</sup> - <i>O</i> - $\alpha$ -D-GalNAc]-N/OFQ |
|---|-----------------------------------------------------------------------------------------------------------------------------------|------------------------------------------------------------------|

Solvents: A: water + 0.1% TFA; B: acetonitrile + 0.1% TFA; From A:B (80:20) to A:B (20:80) in 30 min.

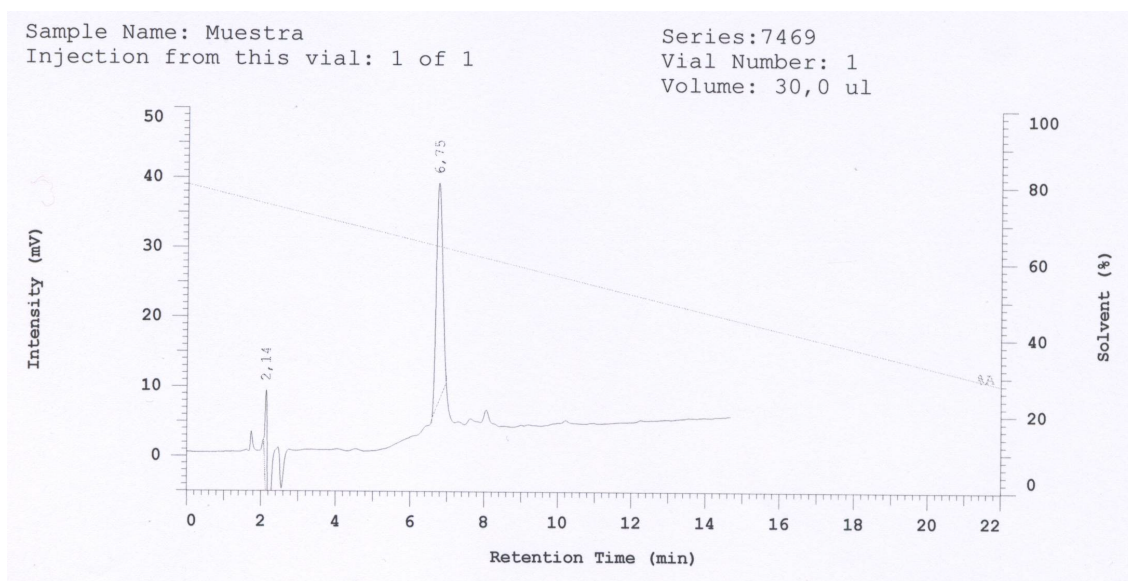

|   |                                                                                                                                           |                                                                   |
|---|-------------------------------------------------------------------------------------------------------------------------------------------|-------------------------------------------------------------------|
| 2 | H-Phe-Gly-Gly-Phe- <i>Thr</i> <sup>5</sup> -Gly-Ala-Arg-Lys- <i>Ser</i> <sup>10</sup> -( $\alpha$ -GalNAc)-Ala-Arg-Lys-Leu-Ala-Asn-Gln-OH | [ <i>Ser</i> <sup>10</sup> - <i>O</i> - $\alpha$ -D-GalNAc]-N/OFQ |
|---|-------------------------------------------------------------------------------------------------------------------------------------------|-------------------------------------------------------------------|

Solvents: A: water + 0.1% TFA; B: acetonitrile + 0.1% TFA. From A:B (90:10) to A:B (80:20) in 5 min, then to A:B (10:90) in 30 min

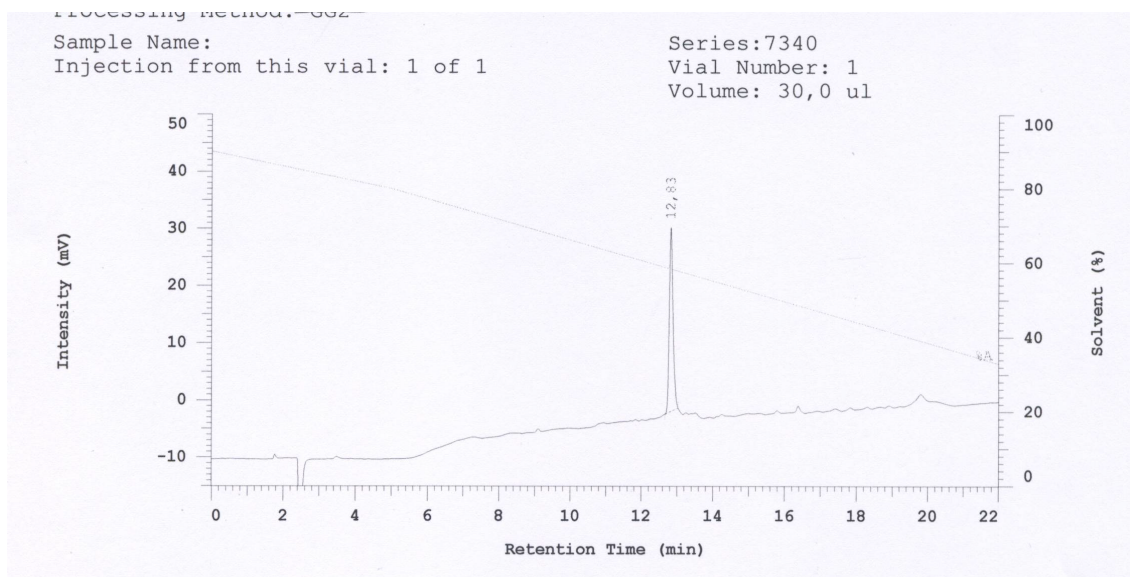

|   |                                                                                                                                     |                                                                 |
|---|-------------------------------------------------------------------------------------------------------------------------------------|-----------------------------------------------------------------|
| 3 | $\text{H-Phe-Gly-Gly-Phe-Thr}^5\text{-Gly-Ala-Arg-Lys-Ser}^{10}\text{-}(\beta\text{-GlcNAc})\text{-Ala-Arg-Lys-Leu-Ala-Asn-Gln-OH}$ | $[\text{Ser}^{10}\text{-O-}\beta\text{-D-GlcNAc}]\text{-N/OFQ}$ |
|---|-------------------------------------------------------------------------------------------------------------------------------------|-----------------------------------------------------------------|

Solvents: A: water + 0.1% TFA; B: acetonitrile + 0.1% TFA; From A:B (80:20) to A:B (20:80) in 30 min.

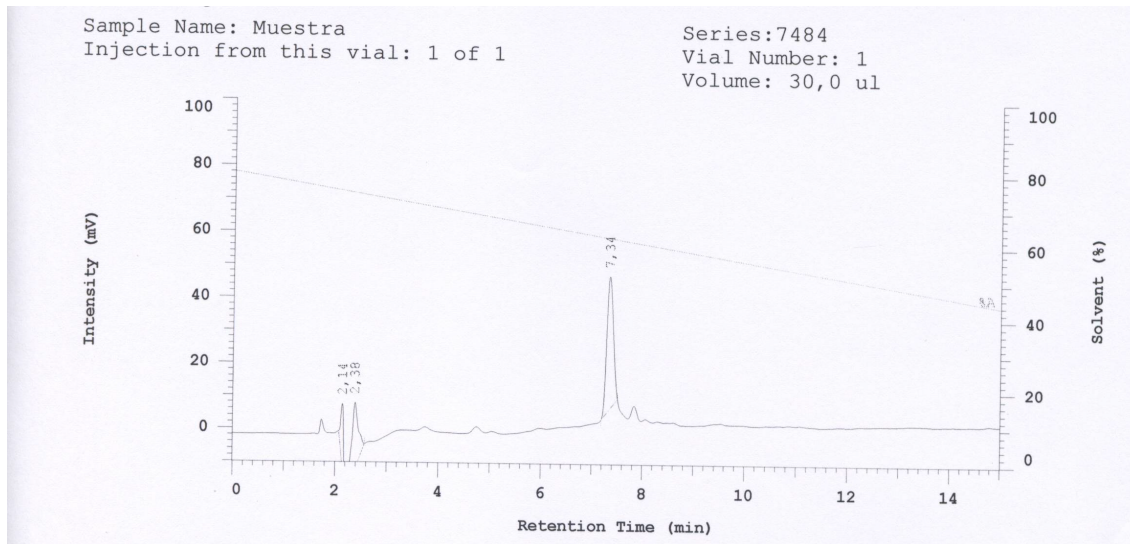

|  |                                                                                        |       |
|--|----------------------------------------------------------------------------------------|-------|
|  | $\text{H-Phe-Gly-Gly-Phe-Thr}^5\text{-Gly-Ala-Arg-Lys-Ala-Arg-Lys-Leu-Ala-Asn-Gln-OH}$ | N/OFQ |
|--|----------------------------------------------------------------------------------------|-------|

Solvents: A: water + 0.1% TFA; B: acetonitrile + 0.1% TFA; From A:B (80:20) to A:B (20:80) in 30 min.

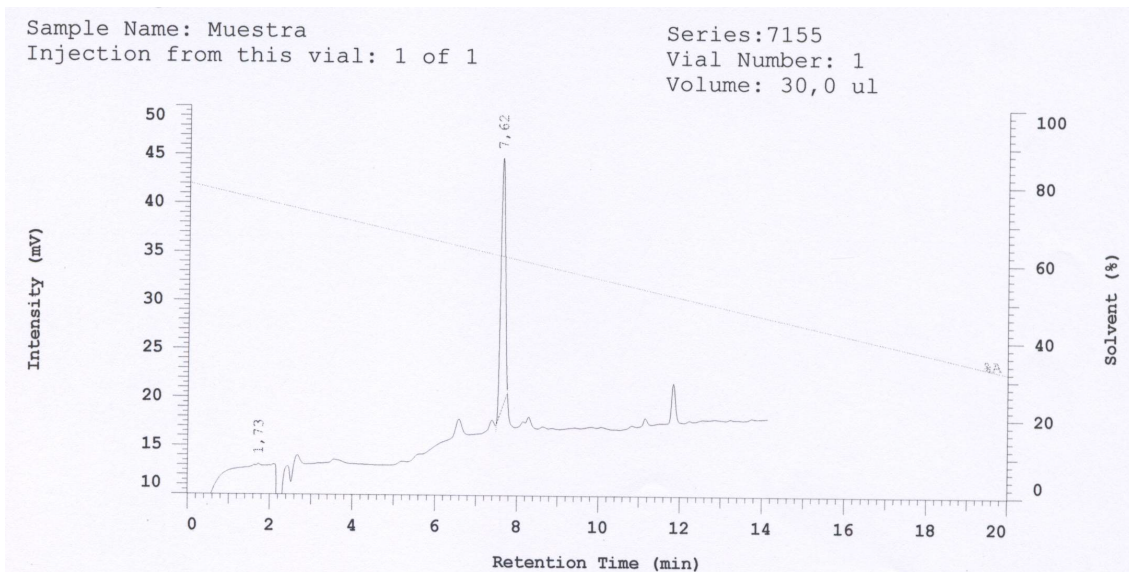

Supplement: c1ob05197k.pdf [file c1ob05197k.pdf]
